# Supplementary material
Source: publisher figshare collection journal article supplement (https://gsapubs.figshare.com/ndownloader/files/23306237)
Supplement: Supplementary file 1 [file 23306237]

**References corresponding to magmatic ages in Figure 2:**

Late Ediacaran

*Selkirk Mountains, southern British Columbia (Hamill Group)*

Colpron, M., Logan, J.M., and Mortensen, J.K., 2002, U-Pb zircon age constraint for late Neoproterozoic rifting and initiation of the lower Paleozoic passive margin of western Laurentia: Canadian Journal of Earth Sciences, v. 39, p. 133-143, doi:10.1139/e01-069.

*Sheeprock Mountains, north-central Utah (Browns Hole Formation)*

Christie-Blick, N., 1997, Neoproterozoic sedimentation and tectonics in west-central Utah: Brigham Young University Geological Studies, v. 42, p. 1-30.

Crittenden, M.D., Jr., and Wallace, C.A., 1973, Possible equivalents of the Belt Supergroup in Utah: Idaho Bureau of Mines and Geology, Belt Symposium vol. 1, p. 116-138.

Early Cambrian

*Wernecke Mountains, northern Yukon (Quartet Mountain lamprophyre suite)*

Milidragovic, D., Thorkelson, D.J., and Marshall, D.D., 2006, Geology of the Quartet Mountain lamprophyre suite, Wernecke Mountains, Yukon, in Emond, D.S., Bradshaw, G.D., Lewis, L.L., and Weston, L.H., eds., Yukon Exploration and Geology 2005, Yukon Geological Survey, p. 231-245.

*Cariboo Lake area, southern British Columbia (Snowshoe Group)*

Ferri, F., and Schiarizza, P., 2006, Re-interpretation of Snowshoe Group stratigraphy across a southwest-verging nappe structure and its implications for regional correlations within the Kootenay terrane, in Colpron, M., and Nelson, J.L., eds., Paleozoic Evolution and Metallogeny of Pericratonic Terranes at the Ancient Pacific Margin of North

America, Canadian and Alaskan Cordillera: Geological Association of Canada Special Paper 45, p. 415-432.

*Adams Lake area, southern British Columbia (Eagle Bay assemblage)*

Paradis, S., Bailey, S.L., Creaser, R.A., Piercey, S.J., and Schiarizza, P., 2006, Paleozoic magmatism and syngenetic massive sulphide deposits of the Eagle Bay assemblage, Kootenay terrane, southern British Columbia, *in* Colpron, M., and Nelson, J.L., eds., Paleozoic Evolution and Metallogeny of Pericratonic Terranes at the Ancient Pacific Margin of North America, Canadian and Alaskan Cordillera: Geological Association of Canada Special Paper 45, p. 383-414.

*Selkirk Mountains, southern British Columbia (Fish Lake volcanics)*

Devlin, W.J., and Bond, G.C., 1988, The initiation of the early Paleozoic Cordilleran miogeocline: evidence from the uppermost Proterozoic-Lower Cambrian Hamill Group of southeastern British Columbia: Canadian Journal of Earth Sciences, v. 25, p. 1-19, doi: 10.1139/e88-001.

*Tintic Mountains, central Utah (Tintic Quartzite)*

Morris, H.T., and Lovering, T.S., 1961, Stratigraphy of the east Tintic Mountains, Utah: United States Geological Survey Professional Paper 361, 145 p.

*Egan Range, central Nevada (Prospect Mountain Quartzite)*

Kellogg, H.E., 1963, Paleozoic stratigraphy of the southern Egan Range, Nevada: Geological Society of America Bulletin, v. 74, p. 685-708, doi: 10.1130/0016-7606(1963)74[685:PSOTSE]2.0.CO;2.

Middle Cambrian to Middle Ordovician

*Selwyn basin, western Yukon (Dempster volcanics)*

Strauss, J.V., Marmrol, P.J., Crowley, J.L., Colpron, M., King, J.D., Kamerer, W.T., and Taylor, J.F., 2016, Middle Cambrian extensional tectonism in Yukon, Canada: New age

constraints and lithogeochemistry from the Dempster volcanics: American Geophysical Union Fall Meeting Abstracts, <http://adsabs.harvard.edu/abs/2016AGUFM.T11B2612S>.

*Misty Creek Embayment, Yukon and Northwest Territories (Marmot Formation)*

Cecile, M.P., 1982, The lower Paleozoic Misty Creek Embayment, Selwyn Basin, Yukon and Northwest Territories: Geological Survey of Canada, Bulletin 335, 78 p.

*Selwyn basin, central Yukon (Menzie Creek formation)*

Pigage, L.C., 2004, Bedrock geology compilation of the Anvil District (parts of NTS 105K/2, 3, 5, 6, 7, and 11), central Yukon: Yukon Geological Survey Bulletin 15, 103 p.

*Selwyn basin, eastern Yukon-Northwest Territories border (Haywire Formation)*

Gordey, S.P., and Anderson, R.G., 1993, Evolution of the northern Cordilleran miogeocline, Nahanni map area (105I), Yukon and Northwest Territories: Geological Survey of Canada Memoir 428, 214 p.

*Cassiar platform, southeastern Yukon (Groundhog formation and related units)*

Tempelman-Kluit, D.J., 2012, Geology of the Quiet Lake and Finlayson Lake map areas, south-central Yukon – an early interpretation of bedrock stratigraphy and structure: Geological Survey of Canada Open File 5487, 103 p.

*Coal River area, southeastern Yukon (Rabbitkettle, Crow, and Sunblood formations)*

Pigage, L.C., Crowley, J.L., Pyle, L.J., Abbott, J.G., Roots, C.F., and Schmitz, M.D., 2012, U-Pb zircon age of an Ordovician tuff in southeast Yukon: implications for the age of the Cambrian-Ordovician boundary: Canadian Journal of Earth Sciences, v. 49, p. 732-741, doi: 10.1139/E2012-017.

Pigage, L.C., Roots, C.F., and Abbott, J.G., 2015, Regional bedrock geology for Coal River map area (NTS 95D), southeast Yukon: Yukon Geological Survey Bulletin 17, 155 p.

*Kechika trough, northern British Columbia (Kechika, Skoki, and Ospika formations)*

Pyle, L.J., 2012, Cambrian and Lower Ordovician Sauk megasequence of northwestern Canada, northern Rocky Mountains to the Beaufort Sea, *in* Derby, J.R., Fritz, R.D., Longacre, S.A., Morgan, W.A., and Sternbach, C.A., eds., The Great American Carbonate Bank: The Geology and Economic Resources of the Cambrian-Ordovician Sauk Megasequence of Laurentia: American Association of Petroleum Geologists Memoir 98, p. 675-723.

*Selkirk Mountains, southern British Columbia (Index Formation)*

Logan, J.M., and Colpron, M., 2006, Stratigraphy, geochemistry, syngenetic sulphide occurrences and tectonic setting of the lower Paleozoic Lardeau Group, northern Selkirk Mountains, British Columbia, *in* Colpron, M., and Nelson, J.L., eds., Paleozoic Evolution and Metallogeny of Pericratonic Terranes at the Ancient Pacific Margin of North America, Canadian and Alaskan Cordillera: Geological Association of Canada Special Paper 45, p. 361-382.

*Big Creek – Beaverhead belt, central Idaho*

Lund, K., Aleinikoff, J.N., Evans, K.V., duBray, E.A., Dewitt, E.H., and Unruh, D.M., 2010, SHRIMP U-Pb dating of recurrent Cryogenian and Late Cambrian-Early Ordovician alkalic magmatism in central Idaho: Implications for Rodinian rift tectonics: Geological Society of America Bulletin, v. 122, p. 430-453, doi: 10.1130/B26565.1.

*Bannock and Bear River ranges, southeastern Idaho (St. Charles Formation)*

Todt, M.K., and Link, P.K., 2013, Sedimentary provenance of the upper Cambrian Worm Creek Quartzite, Idaho, using U-Pb and Lu-Hf isotopic analysis of zircon grains: Northwest Geology, v. 42, p. 293-298.

*Independence Range, northeast Nevada (Snow Canyon Formation)*

Leslie, S.A., Isaacson, P.E., Repetski, J.E., and Weideman, W.L., 1991, Upper plate rocks of the Roberts Mountain thrust, northern Independence Range, northeast Nevada: The Late Cambrian(?) to Middle Ordovician Snow Canyon Formation of the Valmy

Group, *in* Cooper, J.D., and Stevens, C.H., eds., Paleozoic Paleogeography of the Western United States II, Pacific Section, Society for Sedimentary Geology, v. 67, p. 475-486.

Watkins, R., and Browne, Q.J., 1989, An Ordovician continental-margin sequence of turbidite and seamount deposits in the Roberts Mountain allochthon, Independence Range, Nevada: Geological Society of America Bulletin, v. 101, p. 731-741, doi: 10.1130/0016-7606(1989)101<0731:AOCMSO>2.3.CO;2.
